# Supplementary figures and images for: Hyaluronan impairs vascular function and drug delivery in a mouse model of pancreatic cancer
Source: PubMed Central journal article supplement — Gut. 2012 Mar 30;62(1):112–20. doi: 10.1136/gutjnl-2012-302529 (PMC3551211; doi:10.1136/gutjnl-2012-302529), 2012-03-30

### Mean Vessel Density

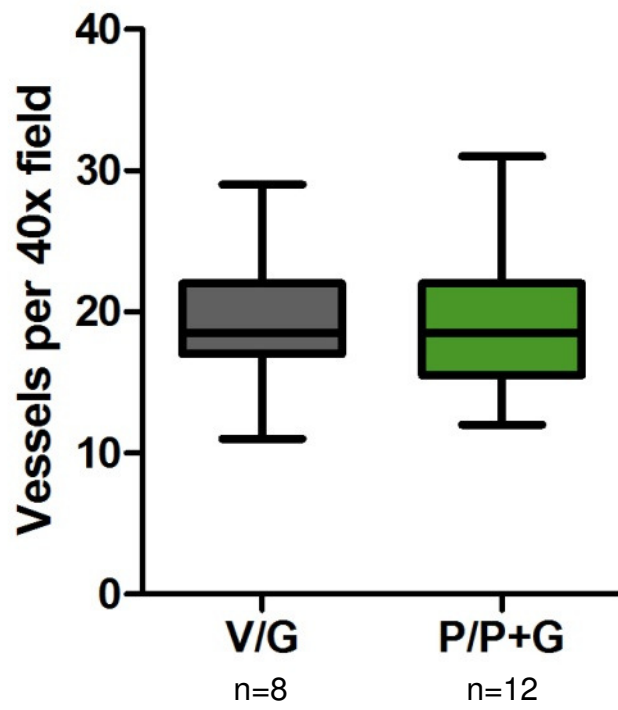

Supplement: gutjnl-2012-302529-s1.pdf [file gutjnl-2012-302529-s1.pdf]

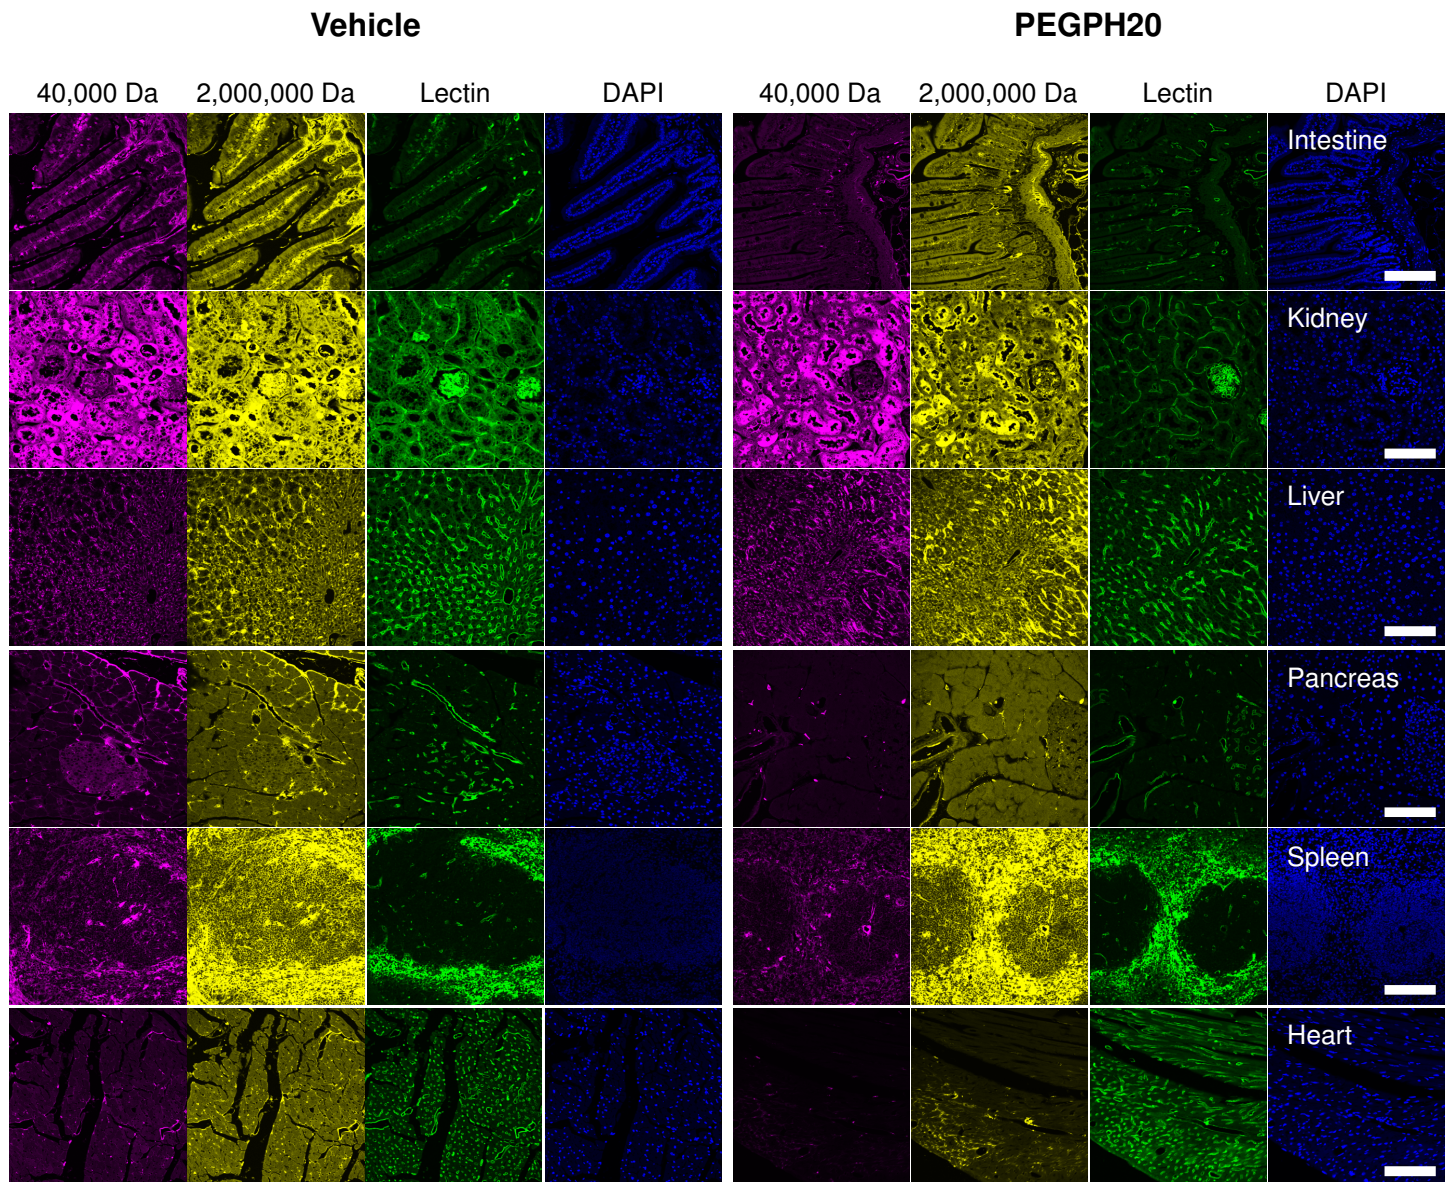

Supplemental Figure 3

Supplement: gutjnl-2012-302529-s3.pdf [file gutjnl-2012-302529-s3.pdf]

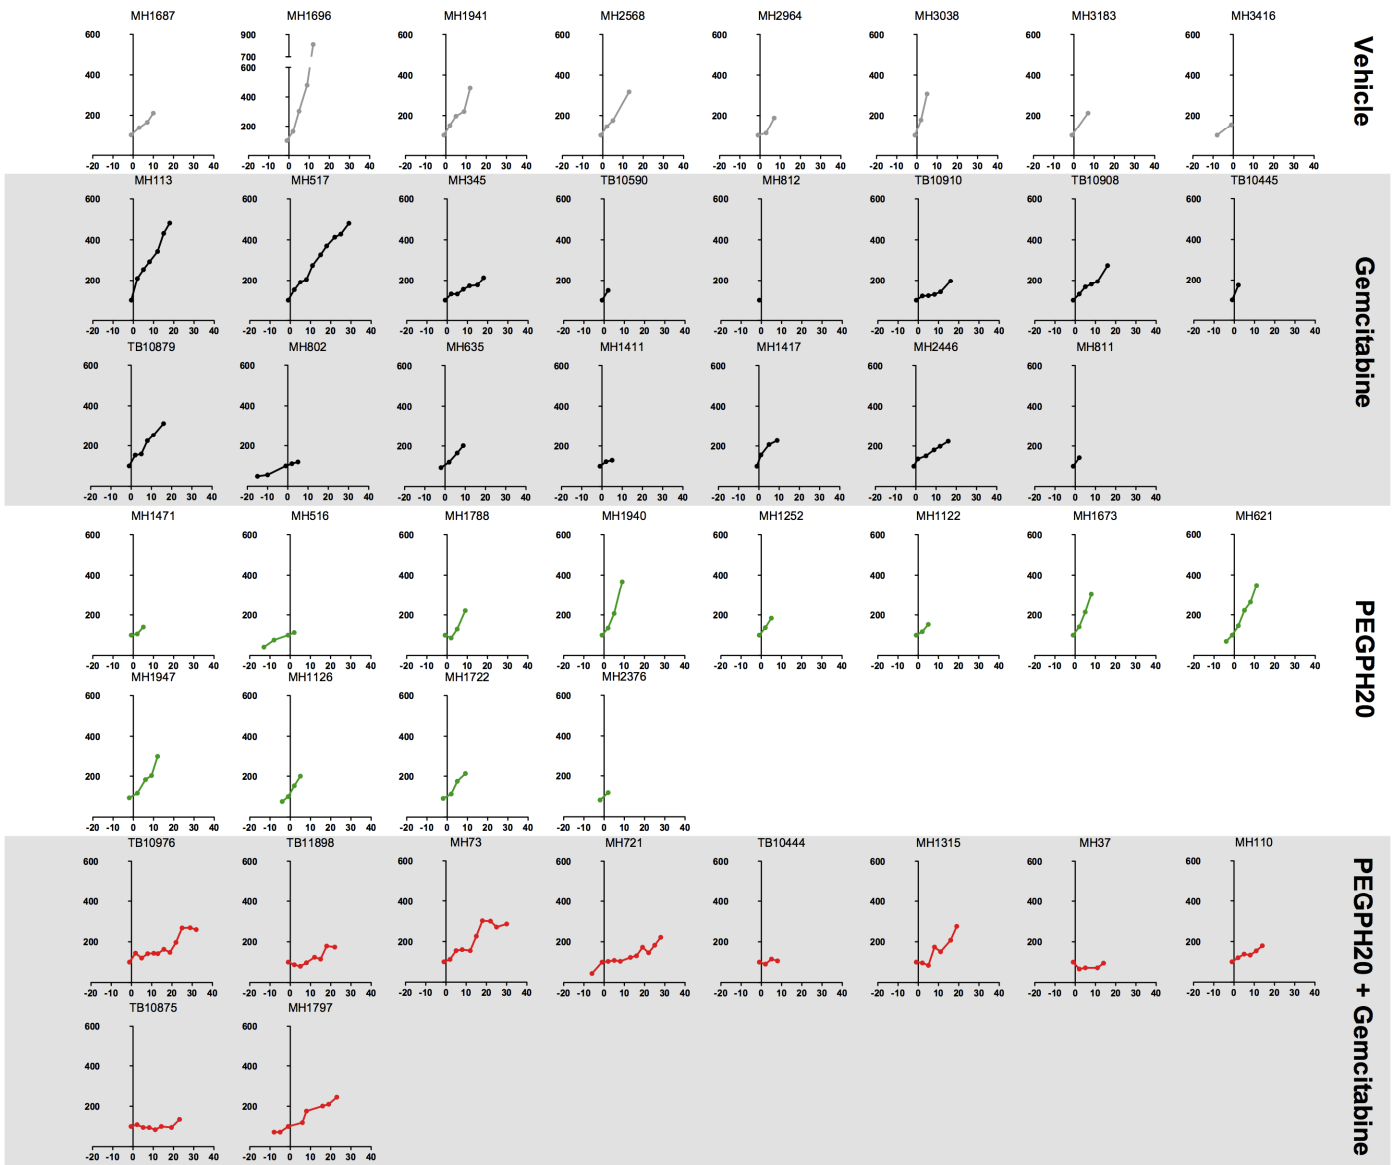

Supplemental Figure 4

Supplement: gutjnl-2012-302529-s4.pdf [file gutjnl-2012-302529-s4.pdf]

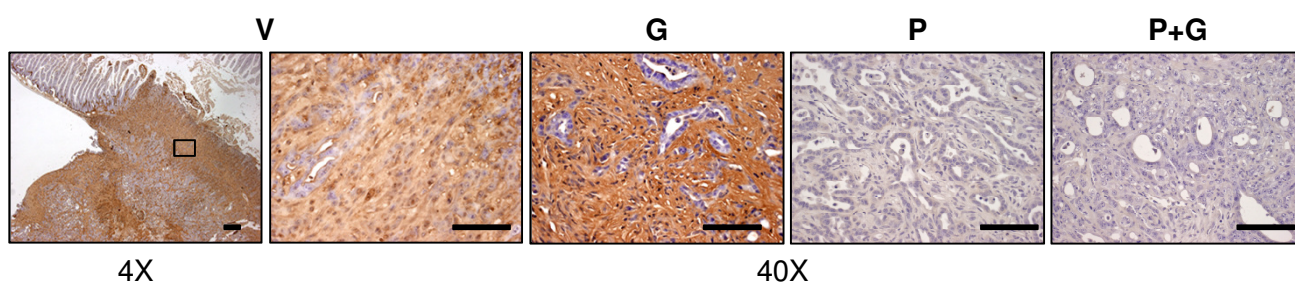

### HABP Intensity

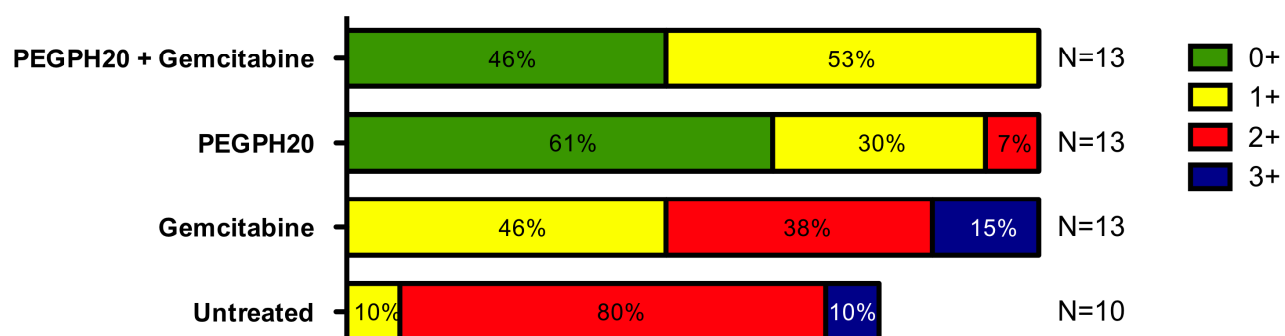

Supplement: gutjnl-2012-302529-s5.pdf [file gutjnl-2012-302529-s5.pdf]
