# Supplementary figures and images for: Hyaluronan impairs vascular function and drug delivery in a mouse model of pancreatic cancer
Source: HighWire-hosted journal article supplement (doi:10.1136/gutjnl-2012-302529), 2012-03-30

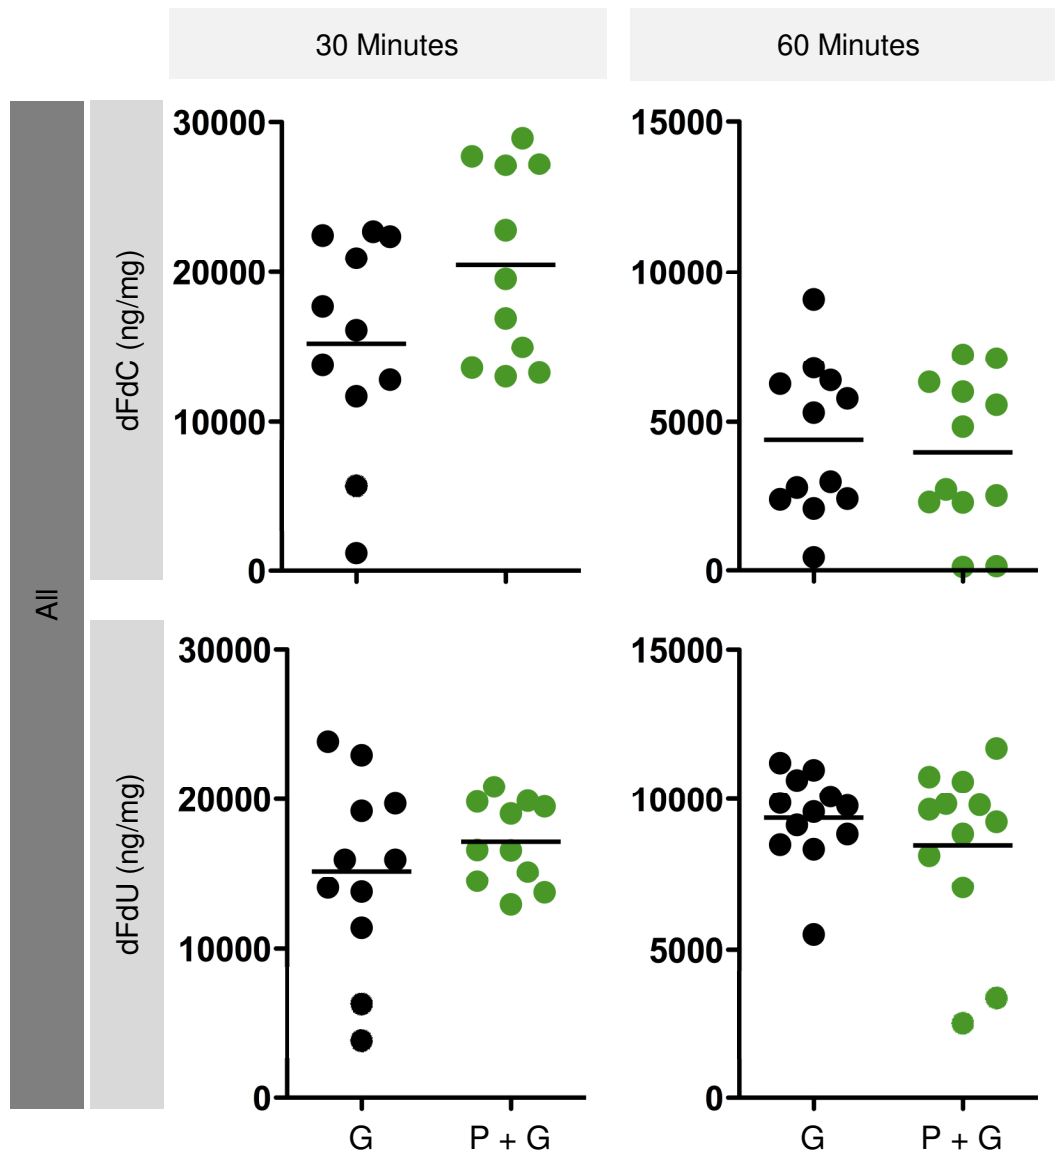

Supplemental Figure 2

Supplement: Sup_2.pdf [file Sup_2.pdf]
